# Supplementary material
Source: PubMed Central journal article supplement (PMC4840950)
Supplement: 59c86acf51793cbb581cb344e18203eb_brain-2014-01903-File010.pdf [file 59c86acf51793cbb581cb344e18203eb_brain-2014-01903-File010.pdf]

|                            | ACR_L   | ACR_R   | ALIC_L  | ALIC_R   | BCC_L    | BCC_R    |
|----------------------------|---------|---------|---------|----------|----------|----------|
| control 19                 | 0.3835  |         | 0.4942  | 0.5139   | 0.5709   | 0.5865   |
| control 25                 | 0.3457  |         | 0.4756  | 0.5204   | 0.5919   | 0.5990   |
| control 35                 | 0.3448  |         | 0.5161  | 0.5309   | 0.5417   | 0.5304   |
| control 5                  | 0.3522  |         | 0.4804  | 0.5036   | 0.5382   | 0.5323   |
| control mean               | 0.3566  |         | 0.4916  | 0.5172   | 0.5607   | 0.5621   |
| control standard deviation | 0.0183  |         | 0.0182  | 0.0115   | 0.0255   | 0.0358   |
| Patient 1                  | 0.2534  |         | 0.5041  | 0.3603   | 0.4642   | 0.4818   |
| z-score_Patient 1          | -5.6469 |         | 0.6900  | -13.6948 | -3.7892  | -2.2402  |
| control 10                 | 0.3508  | 0.3643  | 0.4415  | 0.4911   | 0.5118   | 0.5141   |
| control 14                 | 0.3602  | 0.4005  | 0.4350  | 0.4592   | 0.5170   | 0.5226   |
| control 15                 | 0.3651  | 0.3977  | 0.4361  | 0.4486   | 0.5167   | 0.5243   |
| control 22                 | 0.4041  | 0.4021  | 0.4664  | 0.5019   | 0.5429   | 0.5455   |
| control 9                  | 0.3570  | 0.3949  | 0.4602  | 0.5169   | 0.5519   | 0.5325   |
| control mean               | 0.3674  | 0.3919  | 0.4478  | 0.4835   | 0.5281   | 0.5278   |
| control standard deviation | 0.0211  | 0.0157  | 0.0145  | 0.0288   | 0.0181   | 0.0119   |
| Patient 2                  | 0.2868  | 0.2657  | 0.3493  | 0.3600   | 0.3062   | 0.2847   |
| z-score_Patient 2          | -3.8144 | -8.0528 | -6.7994 | -4.2879  | -12.2861 | -20.5025 |
| control 11                 | 0.3119  | 0.3386  | 0.3886  | 0.4204   | 0.5150   | 0.5179   |
| control 12                 | 0.3346  | 0.3592  | 0.4348  | 0.4521   | 0.5058   | 0.5240   |
| control 13                 | 0.3869  | 0.4097  | 0.4932  | 0.5257   | 0.5823   | 0.5853   |
| control 29                 | 0.3485  | 0.3748  | 0.4442  | 0.4838   | 0.4977   | 0.5213   |
| control 6                  | 0.4026  | 0.3961  | 0.4640  | 0.4924   | 0.5499   | 0.5636   |
| control mean               | 0.3569  | 0.3757  | 0.4450  | 0.4749   | 0.5301   | 0.5424   |
| control standard deviation | 0.0374  | 0.0284  | 0.0386  | 0.0402   | 0.0353   | 0.0303   |
| Patient 3                  | 0.3426  | 0.3633  | 0.4359  | 0.4516   | 0.4558   | 0.4656   |
| z-score_Patient 3          | -0.3828 | -0.4362 | -0.2345 | -0.5795  | -2.1058  | -2.5348  |
| control 25                 | 0.3457  | 0.3651  | 0.4756  | 0.5204   | 0.5919   | 0.5990   |
| control 29                 | 0.3485  | 0.3748  | 0.4442  | 0.4838   | 0.4977   | 0.5213   |
| control 31                 | 0.3394  | 0.3428  | 0.4572  | 0.4880   | 0.5133   | 0.5413   |
| control 39                 | 0.3610  | 0.3514  | 0.4691  | 0.5117   | 0.5597   | 0.5657   |
| control 5                  | 0.3522  | 0.3696  | 0.4804  | 0.5036   | 0.5382   | 0.5323   |
| control mean               | 0.3494  | 0.3607  | 0.4653  | 0.5015   | 0.5402   | 0.5519   |
| control standard deviation | 0.0080  | 0.0133  | 0.0147  | 0.0155   | 0.0374   | 0.0310   |
| Patient 4                  | 0.3349  | 0.3411  | 0.4517  | 0.4793   | 0.4006   | 0.3887   |
| z-score_Patient 4          | -1.8044 | -1.4801 | -0.9279 | -1.4321  | -3.7342  | -5.2667  |
| control 19                 | 0.3835  | 0.4164  | 0.4942  | 0.5139   | 0.5709   | 0.5865   |
| control 35                 | 0.3448  | 0.3621  | 0.5161  | 0.5309   | 0.5417   | 0.5304   |
| control 36                 | 0.3268  | 0.3404  | 0.4874  | 0.5275   | 0.5017   | 0.5300   |
| control 5                  | 0.3522  | 0.3696  | 0.4804  | 0.5036   | 0.5382   | 0.5323   |
| control mean               | 0.3518  | 0.3721  | 0.4945  | 0.5190   | 0.5381   | 0.5448   |
| control standard deviation | 0.0237  | 0.0320  | 0.0154  | 0.0126   | 0.0284   | 0.0278   |
| Patient 5                  | 0.3131  | 0.3315  | 0.4060  | 0.4442   | 0.4789   | 0.4603   |

|                            |                |                |                |                |                |                |
|----------------------------|----------------|----------------|----------------|----------------|----------------|----------------|
| <b>z-score_Patient 5</b>   | <b>-1.6369</b> | <b>-1.2692</b> | <b>-5.7307</b> | <b>-5.9299</b> | <b>-2.0879</b> | <b>-3.0376</b> |
| control 20                 | 0.3910         | 0.4084         | 0.4708         | 0.5115         | 0.5619         | 0.5731         |
| control 33                 | 0.4041         | 0.3987         | 0.4930         | 0.5327         | 0.5634         | 0.5691         |
| control 34                 | 0.3563         | 0.3762         | 0.4791         | 0.5048         | 0.5684         | 0.5946         |
| control 37                 | 0.3535         | 0.3711         | 0.4453         | 0.4906         | 0.5075         | 0.5267         |
| control 38                 | 0.3753         | 0.3825         | 0.4756         | 0.4998         | 0.5577         | 0.5300         |
| control mean               | 0.3760         | 0.3874         | 0.4728         | 0.5079         | 0.5518         | 0.5587         |
| control standard deviation | 0.0218         | 0.0157         | 0.0174         | 0.0158         | 0.0250         | 0.0294         |
| <b>Patient 6</b>           | <b>0.2899</b>  | <b>0.3781</b>  | <b>0.5220</b>  | <b>0.5433</b>  | <b>0.5686</b>  | <b>0.5723</b>  |
| <b>z-score_Patient 6</b>   | <b>-3.9426</b> | <b>-0.5917</b> | <b>2.8243</b>  | <b>2.2374</b>  | <b>0.6715</b>  | <b>0.4629</b>  |
| control 17                 | 0.4232         | 0.4399         | 0.4910         | 0.5339         | 0.5983         | 0.5988         |
| control 2                  | 0.3835         | 0.3817         | 0.4858         | 0.5249         | 0.5590         | 0.5641         |
| control 26                 | 0.4028         | 0.4039         | 0.4742         | 0.5100         | 0.5799         | 0.5849         |
| control 3                  | 0.3570         | 0.3686         | 0.4711         | 0.4990         | 0.4775         | 0.4986         |
| control 32                 | 0.4040         | 0.4135         | 0.4879         | 0.5073         | 0.5548         | 0.5433         |
| control mean               | 0.3941         | 0.4015         | 0.4820         | 0.5150         | 0.5539         | 0.5579         |
| control standard deviation | 0.0250         | 0.0278         | 0.0088         | 0.0141         | 0.0461         | 0.0393         |
| <b>Patient 7</b>           | <b>0.3298</b>  | <b>0.3227</b>  | <b>0.4586</b>  | <b>0.4866</b>  | <b>0.5416</b>  | <b>0.5534</b>  |
| <b>z-score_Patient 7</b>   | <b>-2.5672</b> | <b>-2.8319</b> | <b>-2.6585</b> | <b>-2.0153</b> | <b>-0.2666</b> | <b>-0.1156</b> |
| control 10                 | 0.3508         | 0.3643         | 0.4415         | 0.4911         | 0.5118         | 0.5141         |
| control 14                 | 0.3602         | 0.4005         | 0.4350         | 0.4592         | 0.5170         | 0.5226         |
| control 15                 | 0.3651         | 0.3977         | 0.4361         | 0.4486         | 0.5167         | 0.5243         |
| control 22                 | 0.4041         | 0.4021         | 0.4664         | 0.5019         | 0.5429         | 0.5455         |
| control 9                  | 0.3570         | 0.3949         | 0.4602         | 0.5169         | 0.5519         | 0.5325         |
| control mean               | 0.3674         | 0.3919         | 0.4478         | 0.4835         | 0.5281         | 0.5278         |
| control standard deviation | 0.0211         | 0.0157         | 0.0145         | 0.0288         | 0.0181         | 0.0119         |
| <b>Patient 8</b>           | <b>0.3248</b>  | <b>0.2853</b>  | <b>0.4101</b>  | <b>0.4233</b>  | <b>0.4488</b>  | <b>0.4655</b>  |
| <b>z-score_Patient 8</b>   | <b>-2.0170</b> | <b>-6.8021</b> | <b>-2.6041</b> | <b>-2.0908</b> | <b>-4.3892</b> | <b>-5.2543</b> |
| control 19                 | 0.3835         | 0.4164         | 0.4942         | 0.5139         | 0.5709         | 0.5865         |
| control 35                 | 0.3448         | 0.3621         | 0.5161         | 0.5309         | 0.5417         | 0.5304         |
| control 36                 | 0.3268         | 0.3404         | 0.4874         | 0.5275         | 0.5017         | 0.5300         |
| control 5                  | 0.3522         | 0.3696         | 0.4804         | 0.5036         | 0.5382         | 0.5323         |
| control mean               | 0.3518         | 0.3721         | 0.4945         | 0.5190         | 0.5381         | 0.5448         |
| control standard deviation | 0.0237         | 0.0320         | 0.0154         | 0.0126         | 0.0284         | 0.0278         |
| <b>Patient 9</b>           | <b>0.3323</b>  | <b>0.3489</b>  | <b>0.4706</b>  | <b>0.4965</b>  | <b>0.3496</b>  | <b>0.2974</b>  |
| <b>z-score_Patient 9</b>   | <b>-0.8253</b> | <b>-0.7256</b> | <b>-1.5488</b> | <b>-1.7823</b> | <b>-6.6463</b> | <b>-8.8935</b> |
| control 20                 | 0.3910         | 0.4084         | 0.4708         | 0.5115         | 0.5619         | 0.5731         |
| control 33                 | 0.4041         | 0.3987         | 0.4930         | 0.5327         | 0.5634         | 0.5691         |
| control 34                 | 0.3563         | 0.3762         | 0.4791         | 0.5048         | 0.5684         | 0.5946         |
| control 37                 | 0.3535         | 0.3711         | 0.4453         | 0.4906         | 0.5075         | 0.5267         |
| control 38                 | 0.3753         | 0.3825         | 0.4756         | 0.4998         | 0.5577         | 0.5300         |
| control mean               | 0.3760         | 0.3874         | 0.4728         | 0.5079         | 0.5518         | 0.5587         |

|                            |         |         |         |         |         |         |
|----------------------------|---------|---------|---------|---------|---------|---------|
| control standard deviation | 0.0218  | 0.0157  | 0.0174  | 0.0158  | 0.0250  | 0.0294  |
| Patient 10                 | 0.2381  | 0.2532  | 0.4485  | 0.4632  | 0.4160  | 0.4225  |
| z-score_Patient 10         | -6.3135 | -8.5558 | -1.3915 | -2.8223 | -5.4210 | -4.6363 |
| control 13                 | 0.3869  | 0.4097  | 0.4932  | 0.5257  | 0.5823  | 0.5853  |
| control 25                 | 0.3457  | 0.3651  | 0.4756  | 0.5204  | 0.5919  | 0.5990  |
| control 29                 | 0.3485  | 0.3748  | 0.4442  | 0.4838  | 0.4977  | 0.5213  |
| control 31                 | 0.3394  | 0.3428  | 0.4572  | 0.4880  | 0.5133  | 0.5413  |
| control 5                  | 0.3522  | 0.3696  | 0.4804  | 0.5036  | 0.5382  | 0.5323  |
| control mean               | 0.3545  | 0.3724  | 0.4701  | 0.5043  | 0.5447  | 0.5558  |
| control standard deviation | 0.0187  | 0.0242  | 0.0194  | 0.0187  | 0.0415  | 0.0342  |
| Patient 11                 | 0.3491  | 0.3538  | 0.4579  | 0.4417  | 0.4739  | 0.4677  |
| z-score_Patient 11         | -0.2911 | -0.7699 | -0.6295 | -3.3418 | -1.7068 | -2.5743 |
| control 10                 | 0.3508  | 0.3643  | 0.4415  | 0.4911  | 0.5118  | 0.5141  |
| control 14                 | 0.3602  | 0.4005  | 0.4350  | 0.4592  | 0.5170  | 0.5226  |
| control 15                 | 0.3651  | 0.3977  | 0.4361  | 0.4486  | 0.5167  | 0.5243  |
| control 22                 | 0.4041  | 0.4021  | 0.4664  | 0.5019  | 0.5429  | 0.5455  |
| control 9                  | 0.3570  | 0.3949  | 0.4602  | 0.5169  | 0.5519  | 0.5325  |
| control mean               | 0.3674  | 0.3919  | 0.4478  | 0.4835  | 0.5281  | 0.5278  |
| control standard deviation | 0.0211  | 0.0157  | 0.0145  | 0.0288  | 0.0181  | 0.0119  |
| Patient 12                 | 0.3402  | 0.3506  | 0.4288  | 0.4716  | 0.4524  | 0.4477  |
| z-score_Patient 12         | -1.2885 | -2.6353 | -1.3138 | -0.4144 | -4.1899 | -6.7555 |
| control 19                 | 0.3835  | 0.4164  | 0.4942  | 0.5139  | 0.5709  | 0.5865  |
| control 23                 | 0.3512  | 0.3509  | 0.4454  | 0.4838  | 0.5026  | 0.5054  |
| control 31                 | 0.3394  | 0.3428  | 0.4572  | 0.4880  | 0.5133  | 0.5413  |
| control 5                  | 0.3522  | 0.3696  | 0.4804  | 0.5036  | 0.5382  | 0.5323  |
| control 7                  | 0.3826  | 0.4059  | 0.5049  | 0.5410  | 0.5452  | 0.5346  |
| control mean               | 0.3618  | 0.3771  | 0.4764  | 0.5061  | 0.5340  | 0.5400  |
| control standard deviation | 0.0201  | 0.0328  | 0.0249  | 0.0230  | 0.0270  | 0.0294  |
| Patient 13                 | 0.2383  | 0.2409  | 0.3992  | 0.3982  | 0.3899  | 0.3900  |
| z-score_Patient 13         | -6.1552 | -4.1580 | -3.1045 | -4.6962 | -5.3357 | -5.1086 |
| control 1                  | 0.3491  | 0.3644  | 0.4303  | 0.4746  | 0.5029  | 0.5208  |
| control 17                 | 0.4232  | 0.4399  | 0.4910  | 0.5339  | 0.5983  | 0.5988  |
| control 23                 | 0.3512  | 0.3509  | 0.4454  | 0.4838  | 0.5026  | 0.5054  |
| control 27                 | 0.3852  | 0.4013  | 0.4555  | 0.5168  | 0.5499  | 0.5732  |
| control 9                  | 0.3570  | 0.3949  | 0.4602  | 0.5169  | 0.5519  | 0.5325  |
| control mean               | 0.3731  | 0.3903  | 0.4565  | 0.5052  | 0.5411  | 0.5461  |
| control standard deviation | 0.0315  | 0.0347  | 0.0224  | 0.0249  | 0.0400  | 0.0387  |
| Patient 14                 | 0.3351  | 0.3403  | 0.3946  | 0.4549  | 0.3185  | 0.3099  |
| z-score_Patient 14         | -1.2073 | -1.4390 | -2.7573 | -2.0163 | -5.5623 | -6.1031 |
| control 11                 | 0.3119  | 0.3386  | 0.3886  | 0.4204  | 0.5150  | 0.5179  |
| control 12                 | 0.3346  | 0.3592  | 0.4348  | 0.4521  | 0.5058  | 0.5240  |
| control 13                 | 0.3869  | 0.4097  | 0.4932  | 0.5257  | 0.5823  | 0.5853  |

|                            |             |             |              |              |              |              |
|----------------------------|-------------|-------------|--------------|--------------|--------------|--------------|
| control 29                 | 0.3485      | 0.3748      | 0.4442       | 0.4838       | 0.4977       | 0.5213       |
| control 6                  | 0.4026      | 0.3961      | 0.4640       | 0.4924       | 0.5499       | 0.5636       |
| control mean               | 0.3569      | 0.3757      | 0.4450       | 0.4749       | 0.5301       | 0.5424       |
| control standard deviation | 0.0374      | 0.0284      | 0.0386       | 0.0402       | 0.0353       | 0.0303       |
| Patient 15                 | 0.3368      | 0.3378      | 0.4176       | 0.4740       | 0.3559       | 0.3653       |
| z-score_Patient 15         | -0.5381     | -1.3348     | -0.7082      | -0.0219      | -4.9356      | -5.8443      |
|                            | <b>CP_L</b> | <b>CP_R</b> | <b>GCC_L</b> | <b>GCC_R</b> | <b>PCR_L</b> | <b>PCR_R</b> |
| control 19                 | 0.5823      | 0.5839      |              |              | 0.4075       |              |
| control 25                 | 0.5939      | 0.6169      |              |              | 0.4096       |              |
| control 35                 | 0.5546      | 0.5878      |              |              | 0.3962       |              |
| control 5                  | 0.6106      | 0.5711      |              |              | 0.3926       |              |
| control mean               | 0.5854      | 0.5899      |              |              | 0.4015       |              |
| control standard deviation | 0.0236      | 0.0193      |              |              | 0.0083       |              |
| Patient 1                  | 0.6398      | 0.6603      |              |              | 0.3928       |              |
| z-score_Patient 1          | 2.3109      | 3.6376      |              |              | -1.0396      |              |
| control 10                 | 0.5550      | 0.5739      | 0.5622       | 0.5609       | 0.3790       | 0.3704       |
| control 14                 | 0.5373      | 0.5661      | 0.5833       | 0.5547       | 0.3874       | 0.3966       |
| control 15                 | 0.5363      | 0.5601      | 0.5865       | 0.5642       | 0.3852       | 0.3955       |
| control 22                 | 0.5659      | 0.5575      | 0.6138       | 0.6135       | 0.3965       | 0.3937       |
| control 9                  | 0.5903      | 0.5993      | 0.5827       | 0.5909       | 0.3908       | 0.3972       |
| control mean               | 0.5570      | 0.5714      | 0.5857       | 0.5768       | 0.3878       | 0.3907       |
| control standard deviation | 0.0224      | 0.0168      | 0.0184       | 0.0247       | 0.0065       | 0.0114       |
| Patient 2                  | 0.3861      | 0.3261      | 0.4249       | 0.4028       | 0.3433       | 0.3191       |
| z-score_Patient 2          | -7.6246     | -14.5698    | -8.7294      | -7.0385      | -6.8421      | -6.2708      |
| control 11                 | 0.4906      | 0.5067      | 0.5395       | 0.5418       | 0.4131       | 0.3516       |
| control 12                 | 0.5319      | 0.5417      | 0.5744       | 0.5600       | 0.4160       | 0.3877       |
| control 13                 | 0.5859      | 0.5808      | 0.6268       | 0.6349       | 0.4206       | 0.3617       |
| control 29                 | 0.5316      | 0.5526      | 0.5439       | 0.5803       | 0.3792       | 0.3566       |
| control 6                  | 0.5689      | 0.5651      | 0.6091       | 0.6139       | 0.3905       | 0.3581       |
| control mean               | 0.5418      | 0.5494      | 0.5787       | 0.5862       | 0.4039       | 0.3631       |
| control standard deviation | 0.0371      | 0.0280      | 0.0387       | 0.0382       | 0.0180       | 0.0142       |
| Patient 3                  | 0.4629      | 0.4629      | 0.5506       | 0.5626       | 0.3419       | 0.3375       |
| z-score_Patient 3          | -2.1267     | -3.0939     | -0.7263      | -0.6176      | -3.4386      | -1.8056      |
| control 25                 | 0.5939      | 0.6169      | 0.6016       | 0.6175       | 0.4096       | 0.3850       |
| control 29                 | 0.5316      | 0.5526      | 0.5439       | 0.5803       | 0.3792       | 0.3566       |
| control 31                 | 0.5317      | 0.5918      | 0.5779       | 0.5822       | 0.3230       | 0.3295       |
| control 39                 | 0.5674      | 0.5739      | 0.5829       | 0.5998       | 0.3800       | 0.3877       |
| control 5                  | 0.6106      | 0.5711      | 0.5964       | 0.6061       | 0.3926       | 0.3966       |
| control mean               | 0.5670      | 0.5813      | 0.5805       | 0.5972       | 0.3769       | 0.3711       |
| control standard deviation | 0.0358      | 0.0243      | 0.0226       | 0.0159       | 0.0325       | 0.0277       |
| Patient 4                  | 0.4826      | 0.4554      | 0.4919       | 0.5012       | 0.4244       | 0.3994       |
| z-score_Patient 4          | -2.3593     | -5.1815     | -3.9154      | -6.0442      | 1.4603       | 1.0239       |
| control 19                 | 0.5823      | 0.5839      | 0.6183       | 0.6361       | 0.4075       | 0.4047       |

|                            |         |         |         |         |         |          |
|----------------------------|---------|---------|---------|---------|---------|----------|
| control 35                 | 0.5546  | 0.5878  | 0.5817  | 0.5748  | 0.3962  | 0.3931   |
| control 36                 | 0.5933  | 0.6121  | 0.5598  | 0.5972  | 0.4108  | 0.4012   |
| control 5                  | 0.6106  | 0.5711  | 0.5964  | 0.6061  | 0.3926  | 0.3966   |
| control mean               | 0.5852  | 0.5887  | 0.5891  | 0.6036  | 0.4018  | 0.3989   |
| control standard deviation | 0.0235  | 0.0171  | 0.0246  | 0.0254  | 0.0087  | 0.0051   |
| Patient 5                  | 0.5029  | 0.4753  | 0.4575  | 0.4872  | 0.3701  | 0.3518   |
| z-score_Patient 5          | -3.5034 | -6.6182 | -5.3421 | -4.5838 | -3.6216 | -9.2454  |
| control 20                 | 0.5647  | 0.5843  | 0.6047  | 0.6060  | 0.3825  | 0.3925   |
| control 33                 | 0.5870  | 0.6235  | 0.6179  | 0.6195  | 0.4070  | 0.3841   |
| control 34                 | 0.5922  | 0.6294  | 0.6257  | 0.6267  | 0.4267  | 0.3981   |
| control 37                 | 0.5446  | 0.5440  | 0.5561  | 0.5402  | 0.3589  | 0.3559   |
| control 38                 | 0.6091  | 0.6190  | 0.5943  | 0.5690  | 0.4202  | 0.4049   |
| control mean               | 0.5795  | 0.6000  | 0.5997  | 0.5923  | 0.3991  | 0.3871   |
| control standard deviation | 0.0252  | 0.0359  | 0.0272  | 0.0366  | 0.0281  | 0.0190   |
| Patient 6                  | 0.5876  | 0.6511  | 0.5296  | 0.5796  | 0.3980  | 0.4286   |
| z-score_Patient 6          | 0.3212  | 1.4216  | -2.5774 | -0.3461 | -0.0377 | 2.1801   |
| control 17                 | 0.6186  | 0.5970  | 0.6392  | 0.6325  | 0.4445  | 0.4322   |
| control 2                  | 0.5828  | 0.5899  | 0.5944  | 0.6023  | 0.3959  | 0.3861   |
| control 26                 | 0.5842  | 0.5505  | 0.6007  | 0.6192  | 0.4411  | 0.4055   |
| control 3                  | 0.5411  | 0.5580  | 0.5643  | 0.5525  | 0.4229  | 0.4256   |
| control 32                 | 0.5551  | 0.6027  | 0.6206  | 0.6218  | 0.3446  | 0.3511   |
| control mean               | 0.5764  | 0.5796  | 0.6038  | 0.6057  | 0.4098  | 0.4001   |
| control standard deviation | 0.0299  | 0.0237  | 0.0283  | 0.0316  | 0.0412  | 0.0328   |
| Patient 7                  | 0.5754  | 0.5724  | 0.5551  | 0.5686  | 0.4229  | 0.3950   |
| z-score_Patient 7          | -0.0321 | -0.3040 | -1.7249 | -1.1717 | 0.3177  | -0.1554  |
| control 10                 | 0.5550  | 0.5739  | 0.5622  | 0.5609  | 0.3790  | 0.3704   |
| control 14                 | 0.5373  | 0.5661  | 0.5833  | 0.5547  | 0.3874  | 0.3966   |
| control 15                 | 0.5363  | 0.5601  | 0.5865  | 0.5642  | 0.3852  | 0.3955   |
| control 22                 | 0.5659  | 0.5575  | 0.6138  | 0.6135  | 0.3965  | 0.3937   |
| control 9                  | 0.5903  | 0.5993  | 0.5827  | 0.5909  | 0.3908  | 0.3972   |
| control mean               | 0.5570  | 0.5714  | 0.5857  | 0.5768  | 0.3878  | 0.3907   |
| control standard deviation | 0.0224  | 0.0168  | 0.0184  | 0.0247  | 0.0065  | 0.0114   |
| Patient 8                  | 0.4903  | 0.5303  | 0.5473  | 0.5307  | 0.4033  | 0.3743   |
| z-score_Patient 8          | -2.9747 | -2.4402 | -2.0846 | -1.8660 | 2.3874  | -1.4350  |
| control 19                 | 0.5823  | 0.5839  | 0.6183  | 0.6361  | 0.4075  | 0.4047   |
| control 35                 | 0.5546  | 0.5878  | 0.5817  | 0.5748  | 0.3962  | 0.3931   |
| control 36                 | 0.5933  | 0.6121  | 0.5598  | 0.5972  | 0.4108  | 0.4012   |
| control 5                  | 0.6106  | 0.5711  | 0.5964  | 0.6061  | 0.3926  | 0.3966   |
| control mean               | 0.5852  | 0.5887  | 0.5891  | 0.6036  | 0.4018  | 0.3989   |
| control standard deviation | 0.0235  | 0.0171  | 0.0246  | 0.0254  | 0.0087  | 0.0051   |
| Patient 9                  | 0.5529  | 0.5374  | 0.5460  | 0.5106  | 0.3431  | 0.3320   |
| z-score_Patient 9          | -1.3750 | -2.9947 | -1.7482 | -3.6619 | -6.7086 | -13.1320 |

|                            |         |         |          |         |         |         |
|----------------------------|---------|---------|----------|---------|---------|---------|
| control 20                 | 0.5647  | 0.5843  | 0.6047   | 0.6060  | 0.3825  | 0.3925  |
| control 33                 | 0.5870  | 0.6235  | 0.6179   | 0.6195  | 0.4070  | 0.3841  |
| control 34                 | 0.5922  | 0.6294  | 0.6257   | 0.6267  | 0.4267  | 0.3981  |
| control 37                 | 0.5446  | 0.5440  | 0.5561   | 0.5402  | 0.3589  | 0.3559  |
| control 38                 | 0.6091  | 0.6190  | 0.5943   | 0.5690  | 0.4202  | 0.4049  |
| control mean               | 0.5795  | 0.6000  | 0.5997   | 0.5923  | 0.3991  | 0.3871  |
| control standard deviation | 0.0252  | 0.0359  | 0.0272   | 0.0366  | 0.0281  | 0.0190  |
| Patient 10                 | 0.5036  | 0.5575  | 0.2990   | 0.3122  | 0.3784  | 0.3301  |
| z-score_Patient 10         | -3.0183 | -1.1844 | -11.0510 | -7.6454 | -0.7349 | -2.9944 |

|                            |         |         |         |         |        |         |
|----------------------------|---------|---------|---------|---------|--------|---------|
| control 13                 | 0.5859  | 0.5808  | 0.6268  | 0.6349  | 0.4206 | 0.3617  |
| control 25                 | 0.5939  | 0.6169  | 0.6016  | 0.6175  | 0.4096 | 0.3850  |
| control 29                 | 0.5316  | 0.5526  | 0.5439  | 0.5803  | 0.3792 | 0.3566  |
| control 31                 | 0.5317  | 0.5918  | 0.5779  | 0.5822  | 0.3230 | 0.3295  |
| control 5                  | 0.6106  | 0.5711  | 0.5964  | 0.6061  | 0.3926 | 0.3966  |
| control mean               | 0.5707  | 0.5826  | 0.5893  | 0.6042  | 0.3850 | 0.3659  |
| control standard deviation | 0.0368  | 0.0240  | 0.0308  | 0.0233  | 0.0381 | 0.0262  |
| Patient 11                 | 0.5553  | 0.5430  | 0.5074  | 0.5142  | 0.3906 | 0.3391  |
| z-score_Patient 11         | -0.4198 | -1.6543 | -2.6582 | -3.8568 | 0.1470 | -1.0239 |

|                            |         |         |         |         |        |         |
|----------------------------|---------|---------|---------|---------|--------|---------|
| control 10                 | 0.5550  | 0.5739  | 0.5622  | 0.5609  | 0.3790 | 0.3704  |
| control 14                 | 0.5373  | 0.5661  | 0.5833  | 0.5547  | 0.3874 | 0.3966  |
| control 15                 | 0.5363  | 0.5601  | 0.5865  | 0.5642  | 0.3852 | 0.3955  |
| control 22                 | 0.5659  | 0.5575  | 0.6138  | 0.6135  | 0.3965 | 0.3937  |
| control 9                  | 0.5903  | 0.5993  | 0.5827  | 0.5909  | 0.3908 | 0.3972  |
| control mean               | 0.5570  | 0.5714  | 0.5857  | 0.5768  | 0.3878 | 0.3907  |
| control standard deviation | 0.0224  | 0.0168  | 0.0184  | 0.0247  | 0.0065 | 0.0114  |
| Patient 12                 | 0.5417  | 0.4590  | 0.5492  | 0.5450  | 0.3945 | 0.3549  |
| z-score_Patient 12         | -0.6810 | -6.6754 | -1.9815 | -1.2877 | 1.0337 | -3.1345 |

|                            |         |         |          |          |         |         |
|----------------------------|---------|---------|----------|----------|---------|---------|
| control 19                 | 0.5823  | 0.5839  | 0.6183   | 0.6361   | 0.4075  | 0.4047  |
| control 23                 | 0.5566  | 0.5523  | 0.5535   | 0.5867   | 0.3727  | 0.3777  |
| control 31                 | 0.5317  | 0.5918  | 0.5779   | 0.5822   | 0.3230  | 0.3295  |
| control 5                  | 0.6106  | 0.5711  | 0.5964   | 0.6061   | 0.3926  | 0.3966  |
| control 7                  | 0.6246  | 0.6579  | 0.6114   | 0.6342   | 0.4776  | 0.4500  |
| control mean               | 0.5812  | 0.5914  | 0.5915   | 0.6091   | 0.3947  | 0.3917  |
| control standard deviation | 0.0381  | 0.0401  | 0.0263   | 0.0255   | 0.0563  | 0.0438  |
| Patient 13                 | 0.4955  | 0.4952  | 0.2460   | 0.2840   | 0.3841  | 0.3459  |
| z-score_Patient 13         | -2.2487 | -2.4013 | -13.1358 | -12.7662 | -0.1880 | -1.0468 |

|                            |        |        |        |        |        |        |
|----------------------------|--------|--------|--------|--------|--------|--------|
| control 1                  | 0.5267 | 0.5259 | 0.5547 | 0.5697 | 0.3615 | 0.3427 |
| control 17                 | 0.6186 | 0.5970 | 0.6392 | 0.6325 | 0.4445 | 0.4322 |
| control 23                 | 0.5566 | 0.5523 | 0.5535 | 0.5867 | 0.3727 | 0.3777 |
| control 27                 | 0.6028 | 0.6261 | 0.6080 | 0.6302 | 0.4406 | 0.4085 |
| control 9                  | 0.5903 | 0.5993 | 0.5827 | 0.5909 | 0.3908 | 0.3972 |
| control mean               | 0.5790 | 0.5801 | 0.5876 | 0.6020 | 0.4020 | 0.3917 |
| control standard deviation | 0.0371 | 0.0403 | 0.0366 | 0.0280 | 0.0385 | 0.0337 |

|                            |               |               |              |              |              |              |
|----------------------------|---------------|---------------|--------------|--------------|--------------|--------------|
| Patient 14                 | 0.4729        | 0.3617        | 0.5046       | 0.5237       | 0.3665       | 0.3429       |
| z-score_Patient 14         | -2.8615       | -5.4264       | -2.2705      | -2.8009      | -0.9233      | -1.4458      |
| control 11                 | 0.4906        | 0.5067        | 0.5395       | 0.5418       | 0.4131       | 0.3516       |
| control 12                 | 0.5319        | 0.5417        | 0.5744       | 0.5600       | 0.4160       | 0.3877       |
| control 13                 | 0.5859        | 0.5808        | 0.6268       | 0.6349       | 0.4206       | 0.3617       |
| control 29                 | 0.5316        | 0.5526        | 0.5439       | 0.5803       | 0.3792       | 0.3566       |
| control 6                  | 0.5689        | 0.5651        | 0.6091       | 0.6139       | 0.3905       | 0.3581       |
| control mean               | 0.5418        | 0.5494        | 0.5787       | 0.5862       | 0.4039       | 0.3631       |
| control standard deviation | 0.0371        | 0.0280        | 0.0387       | 0.0382       | 0.0180       | 0.0142       |
| Patient 15                 | 0.5202        | 0.5054        | 0.5279       | 0.5258       | 0.3643       | 0.3296       |
| z-score_Patient 15         | -0.5818       | -1.5734       | -1.3123      | -1.5814      | -2.1959      | -2.3619      |
|                            | <b>PLIC_L</b> | <b>PLIC_R</b> | <b>SCC_L</b> | <b>SCC_R</b> | <b>SCR_L</b> | <b>SCR_R</b> |
| control 19                 | 0.5393        | 0.5906        | 0.5928       | 0.6236       | 0.3690       |              |
| control 25                 | 0.5686        | 0.5968        | 0.6239       | 0.6505       | 0.3637       |              |
| control 35                 | 0.5626        | 0.5933        | 0.5765       | 0.6168       | 0.3715       |              |
| control 5                  | 0.5304        | 0.5559        | 0.5855       | 0.6253       | 0.3305       |              |
| control mean               | 0.5502        | 0.5842        | 0.5947       | 0.6291       | 0.3587       |              |
| control standard deviation | 0.0183        | 0.0190        | 0.0206       | 0.0148       | 0.0191       |              |
| Patient 1                  | 0.6301        | 0.6748        | 0.6194       | 0.6229       | 0.4253       |              |
| z-score_Patient 1          | 4.3680        | 4.7701        | 1.2007       | -0.4166      | 3.4950       |              |
| control 10                 | 0.5372        | 0.5512        | 0.5520       | 0.5671       | 0.3597       | 0.4071       |
| control 14                 | 0.5260        | 0.5411        | 0.5743       | 0.5903       | 0.3437       | 0.3727       |
| control 15                 | 0.5227        | 0.5360        | 0.5743       | 0.5874       | 0.3409       | 0.3756       |
| control 22                 | 0.5349        | 0.5611        | 0.5794       | 0.5958       | 0.4043       | 0.4226       |
| control 9                  | 0.5422        | 0.5749        | 0.5763       | 0.5981       | 0.3852       | 0.4039       |
| control mean               | 0.5326        | 0.5529        | 0.5713       | 0.5877       | 0.3668       | 0.3964       |
| control standard deviation | 0.0081        | 0.0156        | 0.0110       | 0.0123       | 0.0274       | 0.0215       |
| Patient 2                  | 0.4172        | 0.3985        | 0.3996       | 0.4290       | 0.2855       | 0.2944       |
| z-score_Patient 2          | -14.3087      | -9.8669       | -15.6525     | -12.9077     | -2.9674      | -4.7400      |
| control 11                 | 0.4856        | 0.5218        | 0.5465       | 0.5553       | 0.3498       | 0.3508       |
| control 12                 | 0.5167        | 0.5645        | 0.5727       | 0.5886       | 0.3527       | 0.4132       |
| control 13                 | 0.5685        | 0.5793        | 0.6231       | 0.6347       | 0.3820       | 0.3959       |
| control 29                 | 0.5132        | 0.5274        | 0.5681       | 0.5864       | 0.3450       | 0.3718       |
| control 6                  | 0.5482        | 0.5908        | 0.6136       | 0.6276       | 0.3754       | 0.4069       |
| control mean               | 0.5264        | 0.5568        | 0.5848       | 0.5985       | 0.3610       | 0.3877       |
| control standard deviation | 0.0323        | 0.0309        | 0.0324       | 0.0327       | 0.0166       | 0.0260       |
| Patient 3                  | 0.4794        | 0.5038        | 0.4965       | 0.5216       | 0.3067       | 0.3483       |
| z-score_Patient 3          | -1.4550       | -1.7158       | -2.7287      | -2.3548      | -3.2752      | -1.5171      |
| control 25                 | 0.5686        | 0.5968        | 0.6239       | 0.6505       | 0.3637       | 0.3722       |
| control 29                 | 0.5132        | 0.5274        | 0.5681       | 0.5864       | 0.3450       | 0.3718       |
| control 31                 | 0.5123        | 0.5448        | 0.5857       | 0.5957       | 0.3215       | 0.3481       |
| control 39                 | 0.5549        | 0.5921        | 0.5715       | 0.5979       | 0.3659       | 0.4089       |
| control 5                  | 0.5304        | 0.5559        | 0.5855       | 0.6253       | 0.3305       | 0.3646       |

|                            |         |         |          |          |         |         |
|----------------------------|---------|---------|----------|----------|---------|---------|
| control mean               | 0.5359  | 0.5634  | 0.5869   | 0.6112   | 0.3453  | 0.3731  |
| control standard deviation | 0.0252  | 0.0302  | 0.0222   | 0.0263   | 0.0197  | 0.0223  |
| Patient 4                  | 0.4950  | 0.5670  | 0.5090   | 0.5387   | 0.3454  | 0.4260  |
| z-score_Patient 4          | -1.6246 | 0.1194  | -3.5183  | -2.7508  | 0.0041  | 2.3759  |
| control 19                 | 0.5393  | 0.5906  | 0.5928   | 0.6236   | 0.3690  | 0.3841  |
| control 35                 | 0.5626  | 0.5933  | 0.5765   | 0.6168   | 0.3715  | 0.3719  |
| control 36                 | 0.5751  | 0.6204  | 0.5872   | 0.6073   | 0.3655  | 0.4022  |
| control 5                  | 0.5304  | 0.5559  | 0.5855   | 0.6253   | 0.3305  | 0.3646  |
| control mean               | 0.5519  | 0.5901  | 0.5855   | 0.6183   | 0.3591  | 0.3807  |
| control standard deviation | 0.0206  | 0.0264  | 0.0068   | 0.0082   | 0.0192  | 0.0164  |
| Patient 5                  | 0.4994  | 0.5088  | 0.5022   | 0.5256   | 0.3325  | 0.3626  |
| z-score_Patient 5          | -2.5455 | -3.0723 | -12.3186 | -11.3379 | -1.3837 | -1.1012 |
| control 20                 | 0.5445  | 0.5657  | 0.5856   | 0.5987   | 0.3999  | 0.4072  |
| control 33                 | 0.5676  | 0.6049  | 0.6153   | 0.6376   | 0.3658  | 0.3822  |
| control 34                 | 0.5345  | 0.6038  | 0.6061   | 0.6468   | 0.3707  | 0.3993  |
| control 37                 | 0.5175  | 0.5517  | 0.5528   | 0.5728   | 0.3485  | 0.3742  |
| control 38                 | 0.5680  | 0.5990  | 0.6174   | 0.6237   | 0.3993  | 0.4129  |
| control mean               | 0.5464  | 0.5850  | 0.5954   | 0.6159   | 0.3768  | 0.3952  |
| control standard deviation | 0.0218  | 0.0246  | 0.0270   | 0.0302   | 0.0224  | 0.0165  |
| Patient 6                  | 0.6346  | 0.6605  | 0.5281   | 0.6102   | 0.4191  | 0.4621  |
| z-score_Patient 6          | 4.0498  | 3.0644  | -2.4987  | -0.1896  | 1.8904  | 4.0661  |
| control 17                 | 0.5837  | 0.6006  | 0.6371   | 0.6628   | 0.4033  | 0.4486  |
| control 2                  | 0.5425  | 0.5690  | 0.6087   | 0.6455   | 0.3797  | 0.3994  |
| control 26                 | 0.5718  | 0.5892  | 0.6204   | 0.6277   | 0.4050  | 0.4328  |
| control 3                  | 0.5500  | 0.5770  | 0.5410   | 0.5589   | 0.3950  | 0.4455  |
| control 32                 | 0.5372  | 0.5727  | 0.5968   | 0.6363   | 0.3373  | 0.3561  |
| control mean               | 0.5570  | 0.5817  | 0.6008   | 0.6262   | 0.3841  | 0.4165  |
| control standard deviation | 0.0199  | 0.0130  | 0.0366   | 0.0398   | 0.0280  | 0.0390  |
| Patient 7                  | 0.5992  | 0.5868  | 0.5633   | 0.6173   | 0.4150  | 0.3816  |
| z-score_Patient 7          | 2.1191  | 0.3918  | -1.0248  | -0.2245  | 1.1054  | -0.8948 |
| control 10                 | 0.5372  | 0.5512  | 0.5520   | 0.5671   | 0.3597  | 0.4071  |
| control 14                 | 0.5260  | 0.5411  | 0.5743   | 0.5903   | 0.3437  | 0.3727  |
| control 15                 | 0.5227  | 0.5360  | 0.5743   | 0.5874   | 0.3409  | 0.3756  |
| control 22                 | 0.5349  | 0.5611  | 0.5794   | 0.5958   | 0.4043  | 0.4226  |
| control 9                  | 0.5422  | 0.5749  | 0.5763   | 0.5981   | 0.3852  | 0.4039  |
| control mean               | 0.5326  | 0.5529  | 0.5713   | 0.5877   | 0.3668  | 0.3964  |
| control standard deviation | 0.0081  | 0.0156  | 0.0110   | 0.0123   | 0.0274  | 0.0215  |
| Patient 8                  | 0.5011  | 0.5397  | 0.5142   | 0.5561   | 0.3480  | 0.3793  |
| z-score_Patient 8          | -3.9057 | -0.8412 | -5.2029  | -2.5728  | -0.6851 | -0.7939 |
| control 19                 | 0.5393  | 0.5906  | 0.5928   | 0.6236   | 0.3690  | 0.3841  |
| control 35                 | 0.5626  | 0.5933  | 0.5765   | 0.6168   | 0.3715  | 0.3719  |
| control 36                 | 0.5751  | 0.6204  | 0.5872   | 0.6073   | 0.3655  | 0.4022  |



|                            |         |         |          |         |         |         |
|----------------------------|---------|---------|----------|---------|---------|---------|
| control 5                  | 0.5304  | 0.5559  | 0.5855   | 0.6253  | 0.3305  | 0.3646  |
| control mean               | 0.5519  | 0.5901  | 0.5855   | 0.6183  | 0.3591  | 0.3807  |
| control standard deviation | 0.0206  | 0.0264  | 0.0068   | 0.0082  | 0.0192  | 0.0164  |
| Patient 9                  | 0.5230  | 0.5673  | 0.5647   | 0.5745  | 0.3282  | 0.3595  |
| z-score_Patient 9          | -1.4001 | -0.8602 | -3.0759  | -5.3538 | -1.6072 | -1.2898 |
| control 20                 | 0.5445  | 0.5657  | 0.5856   | 0.5987  | 0.3999  | 0.4072  |
| control 33                 | 0.5676  | 0.6049  | 0.6153   | 0.6376  | 0.3658  | 0.3822  |
| control 34                 | 0.5345  | 0.6038  | 0.6061   | 0.6468  | 0.3707  | 0.3993  |
| control 37                 | 0.5175  | 0.5517  | 0.5528   | 0.5728  | 0.3485  | 0.3742  |
| control 38                 | 0.5680  | 0.5990  | 0.6174   | 0.6237  | 0.3993  | 0.4129  |
| control mean               | 0.5464  | 0.5850  | 0.5954   | 0.6159  | 0.3768  | 0.3952  |
| control standard deviation | 0.0218  | 0.0246  | 0.0270   | 0.0302  | 0.0224  | 0.0165  |
| Patient 10                 | 0.5204  | 0.5558  | 0.5062   | 0.5588  | 0.3920  | 0.3790  |
| z-score_Patient 10         | -1.1950 | -1.1863 | -3.3113  | -1.8935 | 0.6782  | -0.9816 |
| control 13                 | 0.5685  | 0.5793  | 0.6231   | 0.6347  | 0.3820  | 0.3959  |
| control 25                 | 0.5686  | 0.5968  | 0.6239   | 0.6505  | 0.3637  | 0.3722  |
| control 29                 | 0.5132  | 0.5274  | 0.5681   | 0.5864  | 0.3450  | 0.3718  |
| control 31                 | 0.5123  | 0.5448  | 0.5857   | 0.5957  | 0.3215  | 0.3481  |
| control 5                  | 0.5304  | 0.5559  | 0.5855   | 0.6253  | 0.3305  | 0.3646  |
| control mean               | 0.5386  | 0.5608  | 0.5973   | 0.6185  | 0.3485  | 0.3705  |
| control standard deviation | 0.0283  | 0.0275  | 0.0250   | 0.0268  | 0.0246  | 0.0172  |
| Patient 11                 | 0.5387  | 0.4959  | 0.5450   | 0.5646  | 0.3520  | 0.3465  |
| z-score_Patient 11         | 0.0035  | -2.3580 | -2.0906  | -2.0085 | 0.1407  | -1.3948 |
| control 10                 | 0.5372  | 0.5512  | 0.5520   | 0.5671  | 0.3597  | 0.4071  |
| control 14                 | 0.5260  | 0.5411  | 0.5743   | 0.5903  | 0.3437  | 0.3727  |
| control 15                 | 0.5227  | 0.5360  | 0.5743   | 0.5874  | 0.3409  | 0.3756  |
| control 22                 | 0.5349  | 0.5611  | 0.5794   | 0.5958  | 0.4043  | 0.4226  |
| control 9                  | 0.5422  | 0.5749  | 0.5763   | 0.5981  | 0.3852  | 0.4039  |
| control mean               | 0.5326  | 0.5529  | 0.5713   | 0.5877  | 0.3668  | 0.3964  |
| control standard deviation | 0.0081  | 0.0156  | 0.0110   | 0.0123  | 0.0274  | 0.0215  |
| Patient 12                 | 0.5064  | 0.5465  | 0.4261   | 0.4721  | 0.3586  | 0.3889  |
| z-score_Patient 12         | -3.2486 | -0.4065 | -13.2362 | -9.4031 | -0.2980 | -0.3477 |
| control 19                 | 0.5393  | 0.5906  | 0.5928   | 0.6236  | 0.3690  | 0.3841  |
| control 23                 | 0.5264  | 0.5673  | 0.5542   | 0.5778  | 0.3383  | 0.3632  |
| control 31                 | 0.5123  | 0.5448  | 0.5857   | 0.5957  | 0.3215  | 0.3481  |
| control 5                  | 0.5304  | 0.5559  | 0.5855   | 0.6253  | 0.3305  | 0.3646  |
| control 7                  | 0.6200  | 0.6365  | 0.5667   | 0.6211  | 0.4446  | 0.4488  |
| control mean               | 0.5457  | 0.5790  | 0.5770   | 0.6087  | 0.3608  | 0.3818  |
| control standard deviation | 0.0427  | 0.0363  | 0.0160   | 0.0211  | 0.0501  | 0.0396  |
| Patient 13                 | 0.5193  | 0.5525  | 0.4268   | 0.4626  | 0.3471  | 0.3706  |
| z-score_Patient 13         | -0.6182 | -0.7299 | -9.3885  | -6.9353 | -0.2728 | -0.2818 |
| control 1                  | 0.4936  | 0.5287  | 0.5569   | 0.5771  | 0.3455  | 0.3708  |

|                            |         |         |         |         |         |         |
|----------------------------|---------|---------|---------|---------|---------|---------|
| control 17                 | 0.5837  | 0.6006  | 0.6371  | 0.6628  | 0.4033  | 0.4486  |
| control 23                 | 0.5264  | 0.5673  | 0.5542  | 0.5778  | 0.3383  | 0.3632  |
| control 27                 | 0.5697  | 0.5966  | 0.5892  | 0.6308  | 0.4030  | 0.4081  |
| control 9                  | 0.5422  | 0.5749  | 0.5763  | 0.5981  | 0.3852  | 0.4039  |
| control mean               | 0.5431  | 0.5736  | 0.5827  | 0.6093  | 0.3751  | 0.3989  |
| control standard deviation | 0.0357  | 0.0288  | 0.0336  | 0.0370  | 0.0312  | 0.0341  |
| Patient 14                 | 0.4896  | 0.4930  | 0.4619  | 0.4955  | 0.3290  | 0.3282  |
| z-score_Patient 14         | -1.5009 | -2.8003 | -3.5946 | -3.0754 | -1.4740 | -2.0756 |

|                            |         |         |         |         |         |         |
|----------------------------|---------|---------|---------|---------|---------|---------|
| control 11                 | 0.4856  | 0.5218  | 0.5465  | 0.5553  | 0.3498  | 0.3508  |
| control 12                 | 0.5167  | 0.5645  | 0.5727  | 0.5886  | 0.3527  | 0.4132  |
| control 13                 | 0.5685  | 0.5793  | 0.6231  | 0.6347  | 0.3820  | 0.3959  |
| control 29                 | 0.5132  | 0.5274  | 0.5681  | 0.5864  | 0.3450  | 0.3718  |
| control 6                  | 0.5482  | 0.5908  | 0.6136  | 0.6276  | 0.3754  | 0.4069  |
| control mean               | 0.5264  | 0.5568  | 0.5848  | 0.5985  | 0.3610  | 0.3877  |
| control standard deviation | 0.0323  | 0.0309  | 0.0324  | 0.0327  | 0.0166  | 0.0260  |
| Patient 15                 | 0.5078  | 0.5507  | 0.4776  | 0.5072  | 0.3156  | 0.3551  |
| z-score_Patient 15         | -0.5766 | -0.1963 | -3.3128 | -2.7957 | -2.7382 | -1.2554 |

**SFG\_L      SFG\_R**

---

|                            |  |  |
|----------------------------|--|--|
| control 19                 |  |  |
| control 25                 |  |  |
| control 35                 |  |  |
| control 5                  |  |  |
| control mean               |  |  |
| control standard deviation |  |  |
| Patient 1                  |  |  |
| z-score_Patient 1          |  |  |

|                            |         |         |
|----------------------------|---------|---------|
| control 10                 | 0.3387  | 0.3476  |
| control 14                 | 0.3411  | 0.3527  |
| control 15                 | 0.3391  | 0.3511  |
| control 22                 | 0.3573  | 0.3662  |
| control 9                  | 0.3425  | 0.3622  |
| control mean               | 0.3437  | 0.3560  |
| control standard deviation | 0.0077  | 0.0079  |
| Patient 2                  | 0.2953  | 0.3080  |
| z-score_Patient 2          | -6.2626 | -6.0918 |

|                            |         |         |
|----------------------------|---------|---------|
| control 11                 | 0.3379  | 0.3428  |
| control 12                 | 0.3443  | 0.3647  |
| control 13                 | 0.3440  | 0.3553  |
| control 29                 | 0.3259  | 0.3414  |
| control 6                  | 0.3598  | 0.3643  |
| control mean               | 0.3424  | 0.3537  |
| control standard deviation | 0.0123  | 0.0112  |
| Patient 3                  | 0.3264  | 0.3307  |
| z-score_Patient 3          | -1.3032 | -2.0449 |

control 25  
control 29  
control 31  
control 39  
control 5  
control mean  
control standard deviation

Patient 4  
z-score\_Patient 4

|                            |        |        |
|----------------------------|--------|--------|
| control 19                 | 0.3442 | 0.3415 |
| control 35                 | 0.3388 | 0.3462 |
| control 36                 | 0.3458 | 0.3484 |
| control 5                  | 0.3198 | 0.3306 |
| control mean               | 0.3372 | 0.3417 |
| control standard deviation | 0.0119 | 0.0079 |

Patient 5  
z-score\_Patient 5

|                            |        |        |
|----------------------------|--------|--------|
| control 20                 | 0.3552 | 0.3616 |
| control 33                 | 0.3388 | 0.3438 |
| control 34                 | 0.3482 | 0.3515 |
| control 37                 | 0.3352 | 0.3497 |
| control 38                 | 0.3563 | 0.3550 |
| control mean               | 0.3467 | 0.3523 |
| control standard deviation | 0.0095 | 0.0066 |

Patient 6  
z-score\_Patient 6

|                            |        |        |
|----------------------------|--------|--------|
| control 17                 | 0.3424 | 0.3521 |
| control 2                  | 0.3707 | 0.3706 |
| control 26                 | 0.3611 | 0.3797 |
| control 3                  | 0.3598 | 0.3561 |
| control 32                 | 0.3517 | 0.3665 |
| control mean               | 0.3571 | 0.3650 |
| control standard deviation | 0.0106 | 0.0111 |

Patient 7  
z-score\_Patient 7

|                            |        |        |
|----------------------------|--------|--------|
| control 10                 | 0.3387 | 0.3476 |
| control 14                 | 0.3411 | 0.3527 |
| control 15                 | 0.3391 | 0.3511 |
| control 22                 | 0.3573 | 0.3662 |
| control 9                  | 0.3425 | 0.3622 |
| control mean               | 0.3437 | 0.3560 |
| control standard deviation | 0.0077 | 0.0079 |

|                   |         |         |
|-------------------|---------|---------|
| Patient 8         | 0.3127  | 0.3232  |
| z-score_Patient 8 | -4.0130 | -4.1611 |

|                            |        |        |
|----------------------------|--------|--------|
| control 19                 | 0.3442 | 0.3415 |
| control 35                 | 0.3388 | 0.3462 |
| control 36                 | 0.3458 | 0.3484 |
| control 5                  | 0.3198 | 0.3306 |
| control mean               | 0.3372 | 0.3417 |
| control standard deviation | 0.0119 | 0.0079 |

|                   |         |         |
|-------------------|---------|---------|
| Patient 9         | 0.3072  | 0.3120  |
| z-score_Patient 9 | -2.5067 | -3.7448 |

|                            |        |        |
|----------------------------|--------|--------|
| control 20                 | 0.3552 | 0.3616 |
| control 33                 | 0.3388 | 0.3438 |
| control 34                 | 0.3482 | 0.3515 |
| control 37                 | 0.3352 | 0.3497 |
| control 38                 | 0.3563 | 0.3550 |
| control mean               | 0.3467 | 0.3523 |
| control standard deviation | 0.0095 | 0.0066 |

|                    |         |         |
|--------------------|---------|---------|
| Patient 10         | 0.3289  | 0.3275  |
| z-score_Patient 10 | -1.8771 | -3.7694 |

|                            |        |        |
|----------------------------|--------|--------|
| control 13                 | 0.3194 | 0.3196 |
| control 25                 | 0.3379 | 0.3428 |
| control 29                 | 0.3354 | 0.3399 |
| control 31                 | 0.3443 | 0.3647 |
| control 5                  | 0.3198 | 0.3306 |
| control mean               | 0.3314 | 0.3395 |
| control standard deviation | 0.0112 | 0.0167 |

|                    |         |         |
|--------------------|---------|---------|
| Patient 11         | 0.3034  | 0.2872  |
| z-score_Patient 11 | -2.4928 | -3.1249 |

|                            |        |        |
|----------------------------|--------|--------|
| control 10                 | 0.3387 | 0.3476 |
| control 14                 | 0.3411 | 0.3527 |
| control 15                 | 0.3391 | 0.3511 |
| control 22                 | 0.3573 | 0.3662 |
| control 9                  | 0.3425 | 0.3622 |
| control mean               | 0.3437 | 0.3560 |
| control standard deviation | 0.0077 | 0.0079 |

|                    |         |         |
|--------------------|---------|---------|
| Patient 12         | 0.3090  | 0.3245  |
| z-score_Patient 12 | -4.4914 | -3.9960 |

|            |        |        |
|------------|--------|--------|
| control 19 | 0.3194 | 0.3196 |
| control 23 | 0.3349 | 0.3384 |
| control 31 | 0.3458 | 0.3484 |
| control 5  | 0.3775 | 0.3702 |
| control 7  | 0.3198 | 0.3306 |

|                            |         |         |
|----------------------------|---------|---------|
| control mean               | 0.3395  | 0.3414  |
| control standard deviation | 0.0240  | 0.0192  |
| Patient 13                 | 0.3254  | 0.3230  |
| z-score_Patient 13         | -0.5876 | -0.9589 |
| control 1                  | 0.3503  | 0.3442  |
| control 17                 | 0.3349  | 0.3384  |
| control 23                 | 0.3611  | 0.3797  |
| control 27                 | 0.3425  | 0.3622  |
| control 9                  | 0.3373  | 0.3387  |
| control mean               | 0.3452  | 0.3526  |
| control standard deviation | 0.0107  | 0.0180  |
| Patient 14                 | 0.3080  | 0.3194  |
| z-score_Patient 14         | -3.4913 | -1.8495 |
| control 11                 | 0.3379  | 0.3428  |
| control 12                 | 0.3443  | 0.3647  |
| control 13                 | 0.3440  | 0.3553  |
| control 29                 | 0.3259  | 0.3414  |
| control 6                  | 0.3598  | 0.3643  |
| control mean               | 0.3424  | 0.3537  |
| control standard deviation | 0.0123  | 0.0112  |
| Patient 15                 | 0.3171  | 0.3277  |
| z-score_Patient 15         | -2.0617 | -2.3116 |

#### Abbreviations

|        |                                                |
|--------|------------------------------------------------|
| ACR_L  | Anterior Corona Radiata- Left                  |
| ACR_R  | Anterior Corona Radiata- Right                 |
| ALIC_L | Anterior Limb of the Internal Capsule- Left    |
| ALIC_R | Anterior Limb of the Internal Capsule- Right   |
| BCC_L  | Body of the Corpus Callosum- Left              |
| BCC_R  | Body of the Corpus Callosum- Right             |
| CP_L   | Cerebral Peduncle- Left                        |
| CP_R   | Cerebral Peduncle- Right                       |
| GCC_L  | Genu of the Corpus Callosum - Left             |
| GCC_R  | Genu of the Corpus Callosum - Right            |
| PCR_L  | Posterior Corona Radiata -Left                 |
| PCR_R  | Posterior Corona Radiata -Right                |
| PLIC_L | Posterior Limb of the Internal Capsule - Left  |
| PLIC_R | Posterior Limb of the Internal Capsule - Right |
| SCC_L  | Splenium of the Corpus Callosum - Left         |
| SCC_R  | Splenium of the Corpus Callosum - Right        |
| SCR_L  | Superior Corona Radiata- Left                  |
| SCR_R  | Superior Corona Radiata- Right                 |
| SFG_L  | Superior Frontal Gyrus White Matter- Left      |
| SFG_R  | Superior Frontal Gyrus White Matter- Right     |
